# Supplementary material for: Selection of reference genes for normalization of RT-qPCR data in gene expression studies in Anthonomus eugenii Cano (Coleoptera: Curculionidae)
Source: PubMed Central journal article supplement (PMC7081190; doi:10.1038/s41598-020-61739-z), 2020-03-19
Supplement: 41598_2020_61739_MOESM1_ESM.pdf [file 41598_2020_61739_MOESM1_ESM.pdf]

## **Supplementary information**

### **Selection of reference genes for normalization of RT-qPCR data in gene expression studies in *Anthonomus eugenii* Cano (Coleoptera: Curculionidae)**

Daniele H. Pinheiro <sup>1,2</sup> & Blair D. Siegfried <sup>1\*</sup>

<sup>1</sup> University of Florida, Entomology and Nematology Department, Charles Steinmetz Hall, P. O. Box 110620, Gainesville, FL, 32611-0620, United States.

<sup>2</sup> Present address: Embrapa Genetic Resources and Biotechnology, Parque Estação Biológica, W5 Norte, P. O. Box 02372, Brasília, DF, 70770-917, Brazil.

\* Correspondence and requests for materials should be addressed to B.D.S. (email: bsiegfried1@ufl.edu).

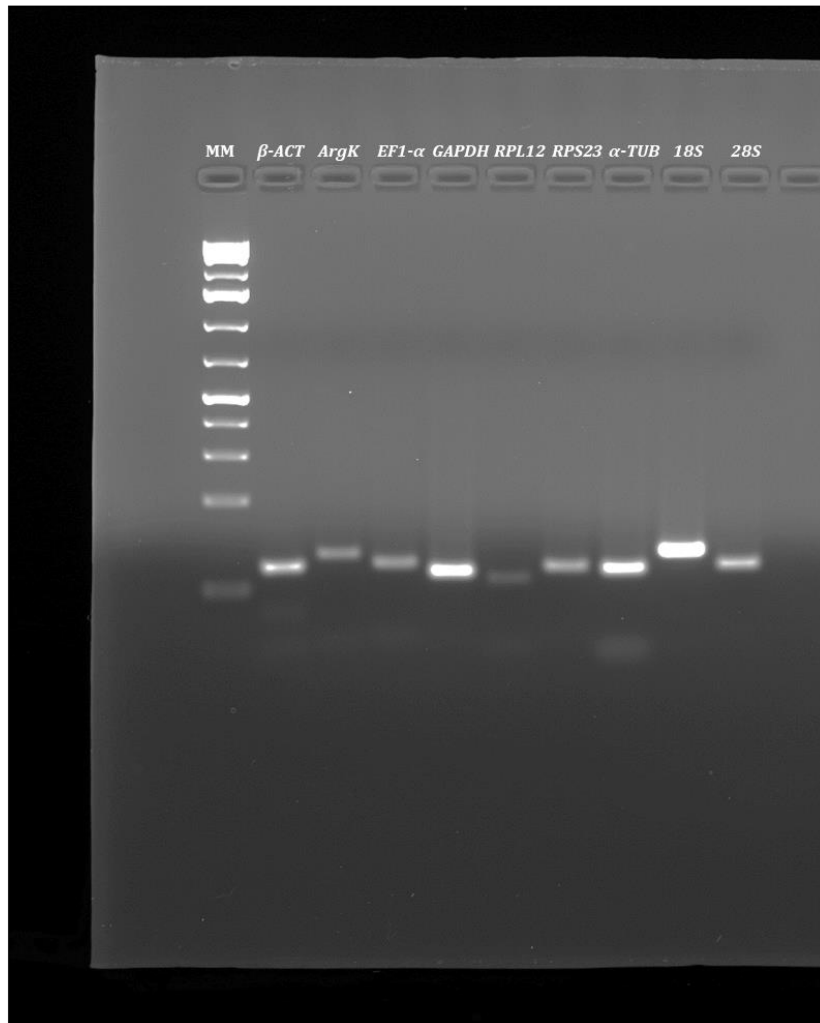

**Supplementary Fig. S1.** Agarose gel (1.5%) indicates the amplification of a single fragment of candidate reference genes.

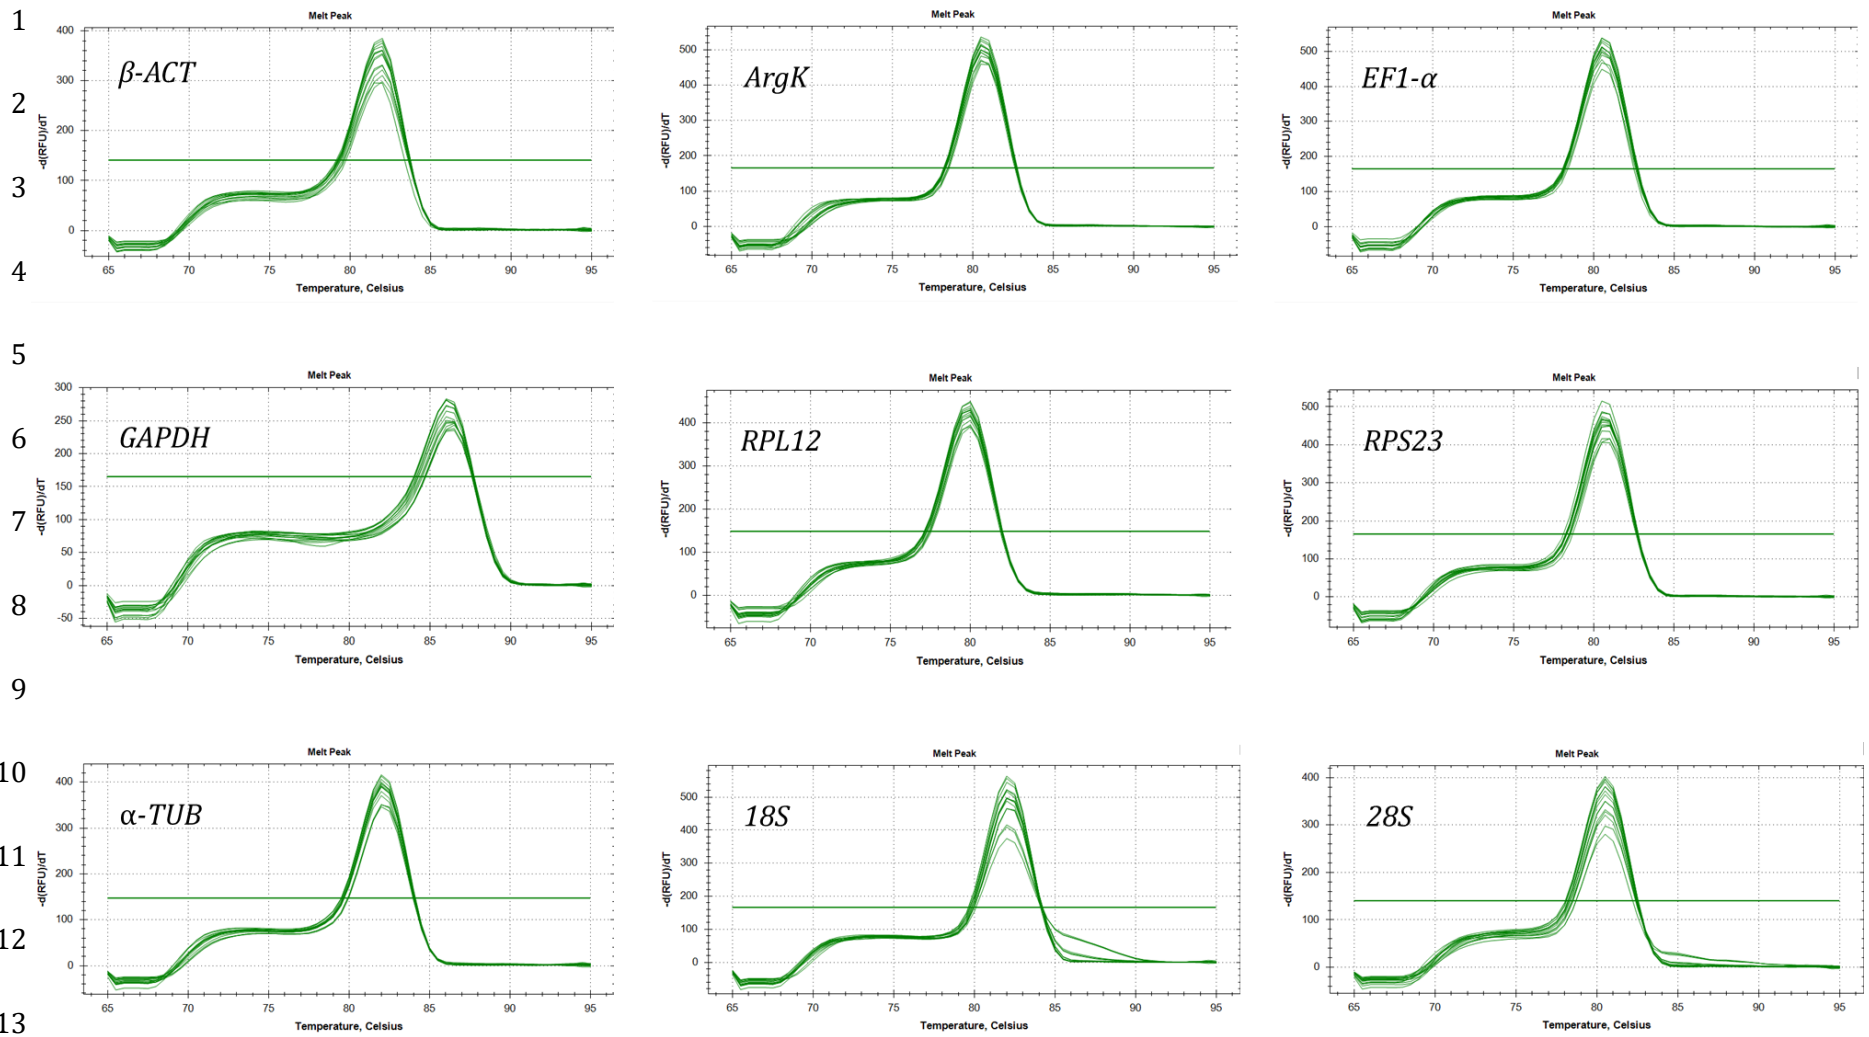

14 **Supplementary Fig. S2.** Melting curves generated by RT-qPCR.

15 **Table S1.** Comprehensive stability ranking of candidate reference genes according to BestKeeper, geNorm and NormFinder.

| Experimental condition | Comprehensive ranking | Gene                           | BestKeeper | GeNorm | NormFinder | Mean |
|------------------------|-----------------------|--------------------------------|------------|--------|------------|------|
| Developmental stages   | 1                     | <i>EF1-<math>\alpha</math></i> | 1          | 3      | 1          | 1.66 |
|                        | 2                     | <i>18S</i>                     | 2          | 5      | 2          | 3    |
|                        | 2                     | <i>RPL12</i>                   | 4          | 1      | 4          | 3    |
|                        | 3                     | <i>28S</i>                     | 3          | 4      | 5          | 4    |
|                        | 4                     | <i>RPS23</i>                   | 5          | 2      | 7          | 4.66 |
|                        | 5                     | <i><math>\alpha</math>-TUB</i> | 8          | 6      | 3          | 5.66 |
|                        | 6                     | <i>GAPDH</i>                   | 6          | 7      | 6          | 6.33 |
|                        | 7                     | <i><math>\beta</math>-ACT</i>  | 7          | 9      | 9          | 8.33 |
|                        | 7                     | <i>ArgK</i>                    | 9          | 8      | 8          | 8.33 |
| Sex                    | 1                     | <i>RPS23</i>                   | 1          | 2      | 3          | 2    |
|                        | 2                     | <i>RPL12</i>                   | 2          | 1      | 4          | 2.33 |
|                        | 3                     | <i>GAPDH</i>                   | 3          | 6      | 2          | 3.66 |
|                        | 4                     | <i><math>\alpha</math>-TUB</i> | 6          | 5      | 1          | 4    |
|                        | 5                     | <i>EF1-<math>\alpha</math></i> | 5          | 3      | 6          | 4.66 |
|                        | 6                     | <i>28S</i>                     | 4          | 4      | 7          | 5    |
|                        | 7                     | <i>18S</i>                     | 7          | 7      | 5          | 6.33 |
|                        | 8                     | <i>ArgK</i>                    | 9          | 8      | 8          | 8.33 |
|                        | 9                     | <i><math>\beta</math>-ACT</i>  | 8          | 9      | 9          | 8.66 |

Continued

16

17

18

|                  |              |              |   |   |      |      |
|------------------|--------------|--------------|---|---|------|------|
| Low temperature  | 1            | <i>GAPDH</i> | 1 | 1 | 1    | 1    |
|                  | 2            | <i>α-TUB</i> | 2 | 2 | 3    | 2.33 |
|                  | 3            | <i>EF1-α</i> | 3 | 3 | 2    | 2.66 |
|                  | 4            | <i>18S</i>   | 4 | 4 | 4    | 4    |
|                  | 5            | <i>28S</i>   | 5 | 6 | 7    | 6    |
|                  | 5            | <i>ArgK</i>  | 7 | 5 | 6    | 6    |
|                  | 6            | <i>RPS23</i> | 5 | 9 | 5    | 6.33 |
|                  | 7            | <i>RPL12</i> | 9 | 7 | 8    | 8    |
| High temperature | 8            | <i>β-ACT</i> | 8 | 8 | 9    | 8.33 |
|                  | 1            | <i>α-TUB</i> | 3 | 1 | 4    | 2.66 |
|                  | 1            | <i>RPS23</i> | 4 | 2 | 2    | 2.66 |
|                  | 2            | <i>GAPDH</i> | 5 | 3 | 1    | 3    |
|                  | 3            | <i>EF1-α</i> | 7 | 4 | 3    | 4.66 |
|                  | 4            | <i>RPL12</i> | 6 | 5 | 7    | 6    |
|                  | 4            | <i>28S</i>   | 1 | 9 | 8    | 6    |
|                  | 5            | <i>18S</i>   | 2 | 8 | 9    | 6.33 |
| All temperatures | 6            | <i>ArgK</i>  | 8 | 7 | 5    | 6.66 |
|                  | 7            | <i>β-ACT</i> | 9 | 6 | 6    | 7    |
|                  | 1            | <i>α-TUB</i> | 1 | 2 | 2    | 1.66 |
|                  | 2            | <i>GAPDH</i> | 5 | 1 | 1    | 2.33 |
|                  | 3            | <i>RPS23</i> | 4 | 6 | 3    | 4.33 |
|                  | 4            | <i>ArgK</i>  | 7 | 3 | 4    | 4.66 |
|                  | 5            | <i>EF1-α</i> | 8 | 4 | 5    | 5.66 |
|                  | 5            | <i>RPL12</i> | 6 | 5 | 6    | 5.66 |
| 6                | <i>18S</i>   | 3            | 8 | 7 | 6    |      |
| 7                | <i>28S</i>   | 2            | 9 | 8 | 6.33 |      |
| 8                | <i>β-ACT</i> | 9            | 7 | 9 | 8.33 |      |

Continued

|            |   |              |   |   |   |      |
|------------|---|--------------|---|---|---|------|
| Starvation | 1 | <i>RPL12</i> | 1 | 3 | 1 | 1.66 |
|            | 2 | <i>α-TUB</i> | 3 | 2 | 4 | 3    |
|            | 2 | <i>18S</i>   | 5 | 1 | 3 | 3    |
|            | 3 | <i>RPS23</i> | 2 | 5 | 5 | 4    |
|            | 4 | <i>GAPDH</i> | 7 | 4 | 2 | 4.33 |
|            | 5 | <i>EF1-α</i> | 4 | 6 | 6 | 5.33 |
|            | 6 | <i>ArgK</i>  | 6 | 7 | 7 | 6.66 |
|            | 7 | <i>28S</i>   | 9 | 8 | 8 | 8.33 |
|            | 8 | <i>β-ACT</i> | 8 | 9 | 9 | 8.66 |
| dsRNA      | 1 | <i>α-TUB</i> | 1 | 3 | 1 | 1.66 |
|            | 2 | <i>RPL12</i> | 3 | 1 | 2 | 2    |
|            | 3 | <i>RPS23</i> | 4 | 2 | 3 | 3    |
|            | 4 | <i>18S</i>   | 5 | 4 | 6 | 5    |
|            | 4 | <i>28S</i>   | 2 | 5 | 8 | 5    |
|            | 5 | <i>EF1-α</i> | 6 | 6 | 5 | 5.66 |
|            | 6 | <i>GAPDH</i> | 8 | 8 | 4 | 6.66 |
|            | 7 | <i>ArgK</i>  | 7 | 7 | 7 | 7    |
|            | 8 | <i>β-ACT</i> | 9 | 9 | 9 | 9    |

20

21

22

23

24

25 **Table S2.** Sequence and amplicon size of the primers used for cloning.

| Primer            | Sequence 5'-3'                   | Tm (°C) | Size (bp) | Reference             |
|-------------------|----------------------------------|---------|-----------|-----------------------|
| ArgK-F            | CCTGTTTCGACCCTATCATCGARGAYTAYCA  | 55      | 733       | Yang et al., 2016     |
| ArgK-R            | GTCGTAGATACCACCTTCAGCTTCNGTRTGTC |         |           |                       |
| EF1- $\alpha$ -F  | GCCGGTACYGGWGAATTCGAAGC          | 55      | 290       | Pinheiro et al., 2019 |
| EF1- $\alpha$ -R  | CATCCCTTGAACCBGGCATCTT           |         |           |                       |
| RPL12-F           | ATGCCMCAAARTTCGAYCCSA            | 55      | 365       | Pinheiro et al., 2019 |
| RPL12-R           | GCCATDGAKCKDGGCCTCATTTG          |         |           |                       |
| RPS23-F           | TGGGCYGACAARGAKTACAARAAAGC       | 55      | 300       | This study            |
| RPS23-R           | CCTTRAATCTDACWCCRGGGAATATC       |         |           |                       |
| $\alpha$ -TUB-F   | ATCAAGACCAARCGTACCATCC           | 55      | 257       | Pinheiro et al., 2019 |
| $\alpha$ -TUB-R   | TCAGAGAAYTCWCCTTCYTCCATACC       |         |           |                       |
| 18S-F             | GTTGCGGTTAAAAAGCTCGT             | 50      | 644       | This study            |
| 18S-R             | GTGAGGTTTCCCGTGTGAG              |         |           |                       |
| 28S-F             | CGAGATTCCCCTGTCCCTA              | 55      | 532       | This study            |
| 28S-R             | ACTGAACATCGGGATCAAGC             |         |           |                       |
| RpII140-F         | TTGGAGTTYTTGGAGGAGTGGTC          | 55      | 581       | This study            |
| RpII140-R         | CCCATGGCTTGYTTDCCCAT             |         |           |                       |
| Pro $\alpha$ -2-F | CAAATYGARTATGCCTTRGCTGC          | 50      | 581       | Pinheiro et al., 2019 |
| Pro $\alpha$ -2-R | TCACAAATHCCDACTTCAATRTTATC       |         |           |                       |

Tm - Melting temperature used in PCR amplification reactions.

26

27

28

1 **References**

2 Yang, C. *et al.* Selection of reference genes for RT-qPCR analysis in a predatory biological  
3 control agent, *Coleomegilla maculata* (Coleoptera: Coccinellidae). *Sci. Rep.* **5**, 18201 (2016).

4 Pinheiro, D. H., Taylor, C. E., Wu, K. & Siegfried, B. D. Delivery of gene-specific dsRNA by  
5 microinjection and feeding induces RNAi response in Sri Lanka weevil, *Mylocerus*  
6 *undecimpustulatus undatus* Marshall. *Pest Manag. Sci.* (2019). doi:10.1002/ps.5601

7
